# Supplementary material for: Indigenous Values and Health Systems Stewardship in Circumpolar Countries
Source: Int J Environ Res Public Health. 2017 Nov 27;14(12):1462. doi: 10.3390/ijerph14121462 (PMC5750881; doi:10.3390/ijerph14121462)
Supplement: Supplementary File 1 [file ijerph-14-01462-s001.xlsx]

## Sheet: Sheet1
					Appendix A - Data from consensus process
	Phase	Values
	Phase 1 & 2	1	2	3	4	5	6	7	8	9
	Values from Independent synthesis	Teachings	Cultural responsiveness	Respect	Community voice	Holism	Kinship	Empowerment	Nourishment	Humanity
		Learn and do what you lean = teach	Language and communication	Understanding respect for different world view(s)	Boundaries	"Circle"	family	short distance to hospital/health care	Food/sharing	care
		Education and training	Indigenous knowledge/understanding	Respect	Empowerment	Holistic	family	co-ordinate for the patient not the system	nourishment	acceptance
		Indigenous context in the education system	Knowledge	Reciprocity	Resurgence of traditional values + way	Holistic perspectives	know who you come from	patient in centrum	water	sympathy/empathy
		Capacity building	All things are connected	Reciprocity	Sovereignty	Diversity	Home, love and respect to land	"situated response" process that respects culture/spirit and relations	housing	have patience
		Traditions		Honor the elders	Place/land	Diversity		availability	traditional medicines	together
			Language	Honour	History	interconnections		lifespan perspective	livelihood	emphathy
			Protocols	Respect to culture	Life			access	environment connection	see the humor/laugh/smile
			Communication	Show respect to others	Traditional Knowledge			community driven		compassion
			Traditional Knowledge	Sacred	decolonization					pray for guidance
					ties to homeland					listening
					Time vs. timelessness					love
										take care of others
										caring
										responsibility
										live carefully
										patience
										respect
										share what you have
										sensitivity
	Phase 3									care
	Group work summariaing themes									accept life as it occurs
	Group 1	Collaboration through indigenous knowledge transmission and knowledge receipt to achieve continuity in health and/or shared outcomes	Processes that must be reconceived to conduct community values centered health care	Manner in which interpersonal and community to community interactions should take place in	Historical legacies influence community conception of health, power relationships in health systems, and recognizes/leverages indigenous knowledge and the significance of forbearance in indigenous culture(s)	Recognition of place in the continuity of the cosmos, including space, time, place and purpose. Includes conception of distinctive roles, responsibilities, and restrictions/possibilities.	Community members’ shared histories, experiences, language(s), economy/trades which shape how we conceive health, experience health care, develop trust in healthcare systems, and interact with western medical systems.	"Community driven health care" The traditional and contemporary values of the community (ies) drive design, processes, and delivery of health care.	Structural and systematic influences on health and wellbeing with locus of control varying due to sociopolitical climate	Self-regulation concepts/Series of beliefs (mindset, spirituality) conducive to or complementary to a wholesome/full life
	Group 2	High quality culture sensitive health care services in own langauge		Respect of traditions, traditional knowledge and traditional healing methods	Established (by indigenous peoples) community care based on the needs, way of thinking, holistic perspective, of the indigenous peoples (instead of "translating" the systems of majorities to an indigenous language)	"circle" biopsychosocial			FOOD, local traditional food and nourishment
	Group 3	shared research, self-reflection for person doing the work, collaboration, cooperativeness		+Active listening +trust. Respect embraces sensitivity and transparency and consensus	Preserving dignity, responsible, informed decisions that promote autonomy and independence	Maintenance of quality of our mental physical emotional spiritual life; we're in our highest functioning way			Sustainability, wise use of resources, equity in distribution and access to those resources	Humanitarian way of doing things; this value is foundational to many of the other ways
	Group 4	Traditional teachings have a central place in education and training of caregivers and health authorities; must look at spiritual and environment Laws → natural order Teaching must have a holistic view which must be shared with people who work in the field of health Interconnectedness must be part of the health system, health policy, and health directives	Protocols and clear communication need to be addressed, whether the protocols come from traditional knowledge or from language	Mutual respect (“two-way street”)	See holism	When people have a stable place they know their history tied to land and home, sense of tradition and values. They understand their place on the land. They understand their boundaries [physical boundaries tied to land] à empowerment [being rooted in own land and understanding how others fit in]. People with a sense of worth. Having this knowledge can lead to decolonization. Sense of empowerment a…	Home, respect for the land. Family must know who you are related to, sense of extended family, must know where they came from and their place in the family. Everyone has a gift that they contribute to their family (unique contribution). The whole family must know their identity.Important to see family as sacred, see sacredness of families as en entity. Worldview must be reflective and respect dif…	Services must be available, all must have access to hospitals and health centers. People in communities must have say in what services are provided at the community level	Water is essential to the health of people, whether living on water or land. Nourishment, food security, sharing of food; -- all must have their place in hospitals and health authorities for people to access in order to maintain balanced health	humans struggle to strive for peace; conflict has always been a problem Often in cross-cultural situations need time to build trust – for wellbeing of both parties
		(emphasising interdepence) When everything is said and done, it’s all about diverse communities and their interdependence
	Phase 4
	Summary value	Teaching	Cultural Responsiveness	Respect	Community Voice	Holism	Kinship	Empowerment	Nourishment
										Humanity
	Description of values	Traditional teachings have a central place in the education and training of caregivers and other people who work in health systems. Supporting cultural sensitivity by promoting a knowledge exchange among healthcare workers, researchers, and communities that incorporates a holistic view of the interconnectedness of traditional, spiritual, and environmental laws and an understanding of the natural …	Having processes and protocols in place that focus healthcare on community values and culture, drawing on Indigenous/traditional knowledge, local languages, and styles of communication.	The manner in which interpersonal and community-to-community interactions should take place. Mutual respect for differences within and between families and communities. Respect of traditions, traditional knowledge, and traditional healing methods. Respect through active listening, trust, sensitivity, transparency, and consensus.	The traditional and contemporary values of the community drive the design, processes, and delivery of healthcare. Community members’ shared histories, experiences, language(s), and economy/trades shape how they conceive of health, experience healthcare, develop trust in healthcare systems, and interact with Western medical systems. Access to quality healthcare for all members of the community.	Having a holistic view of a person’s ties to land, home, traditions, values, distinctive roles and responsibilities, and boundaries/possibilities. Recognizing one’s place in the continuity of space, time, location, and purpose. Interconnections between the quality of our mental, physical, emotional, and spiritual lives.	Family as an expanded network of kinship associations. Family is sacred and gives a sense of place and origin. Recognizing each person’s unique contribution to family in the context of home and the land.	Promoting the sense of worth and empowerment of individuals, families, and communities as derived from understanding one’s place in the natural order and one’s ties to land and tradition. Establishing community care based on the needs, ways of thinking, and holistic perspectives of Indigenous peoples to preserve dignity and support. Informed decisions promote autonomy and independence.	Recognizing the importance of water and food as nourishment to achieve balanced health. Emphasizing local/traditional food and the sharing of food, and recognizing the need to use resources wisely and to ensure equitable access.	Emphasizing the fundamentality of relationships between human beings. Recognizing aspects of those relationships, including empathy, sensitivity, respect, and care, that sustain a wholesome life, build trust, and bridge conflict in cross-cultural settings.
